# Supplementary material for: The Impact of Heterogeneity and Ill-Conditioning on Diffusion Model Parameter Estimates
Source: Atypon-hosted journal article supplement (doi:10.1287/mksc.21.2.209.151), 2002-05-01
Supplement: mksc.21.2.209.151-sm-technical-appendix.pdf [file mksc.21.2.209.151-sm-technical-appendix.pdf]

## The Impact of Heterogeneity and Ill-Conditioning on Diffusion Model Parameter Estimates

Albert C. Bemmaor\*

Janghyuk Lee\*

October 2001

\* Albert C. Bemmaor is a Professor (e-mail: [bemmaor@essec.fr](mailto:bemmaor@essec.fr), tel: 33 1 34 43 30 43, fax: 33 1 34 43 30 01), Ecole Supérieure des Sciences Economiques et Commerciales (ESSEC), 95021 Cergy-Pontoise Cedex, France. Janghyuk Lee is an Assistant Professor, Groupe HEC, 78351 Jouy-en-Josas Cedex, France (e-mail: [lee@hec.fr](mailto:lee@hec.fr), tel: 33 1 39 67 94 40, fax: 33 1 39 67 70 87). Janghyuk Lee thanks the doctoral program at ESSEC for its financial assistance. The authors are grateful to the anonymous reviewers for their comments on an earlier draft of this study and the participants of the Marketing Science Conference in Syracuse, NY and the joint ESSEC/HEC/INSEAD seminar.

## Appendix 1

### Mean and Variance of the Individual-level Shifted Gompertz Model

The mean and variance of the individual-level shifted Gompertz model are, respectively:

$$E(t \mid \eta, b) = (-1/b)[E(\ln T) - \ln \eta]$$

$$V(t \mid \eta, b) = (1/b^2)[E(\ln^2 T) - E^2(\ln T)]$$

with  $T = \eta e^{-bt}$ ,  $E(\ln T) = [1 + (1/\eta)] \int_0^\eta e^{-T} \ln T \, dT - (1/\eta) \int_0^\eta T e^{-T} \ln T \, dT$  and

$$E(\ln^2 T) = [1 + (1/\eta)] \int_0^\eta e^{-T} \ln^2 T \, dT - (1/\eta) \int_0^\eta T e^{-T} \ln^2 T \, dT.$$

Note: The formula for  $E(\ln T)$  corrects an error in Bemmaor (1994, Table 2).

Appendix 2  
The Gamma/Shifted Gompertz Model: Key Formulas

| Components             | Characteristics                                                       | Analytical expression                                                                                                                                                                                                                                   |
|------------------------|-----------------------------------------------------------------------|---------------------------------------------------------------------------------------------------------------------------------------------------------------------------------------------------------------------------------------------------------|
| Individual-level Model | Cumulative distribution function                                      | $F(t / \eta, b) = (1 - e^{-bt})\exp(-\eta e^{-bt}), t > 0, b, \eta > 0$                                                                                                                                                                                 |
|                        | Probability density function                                          | $f(t / \eta, b) = be^{-bt} \exp(-\eta e^{-bt})[1 + \eta(1 - e^{-bt})]$                                                                                                                                                                                  |
|                        | Abscissa of the mode of the probability density function              | $t^* = 0, 0 < \eta \leq 0.5$<br>$t^* = (-1/b)\ln x^*, 0 < x^* < 1,$<br>with $x^* = [3 + \eta - (\eta^2 + 2\eta + 5)^{1/2}]/(2\eta), \eta > 0.5$                                                                                                         |
| Model of Heterogeneity | Probability density function                                          | $h(\eta) = \frac{1}{\beta^\alpha \Gamma(\alpha)} \eta^{\alpha-1} e^{-(1/\beta)\eta}, \eta > 0, \alpha, \beta > 0$                                                                                                                                       |
|                        | Mean                                                                  | $E(\eta) = \alpha\beta$                                                                                                                                                                                                                                 |
|                        | Variance                                                              | $V(\eta) = \alpha\beta^2$                                                                                                                                                                                                                               |
| Mixture                | Cumulative distribution function                                      | $F(t) = (1 - e^{-bt})/(1 + \beta e^{-bt})^\alpha$                                                                                                                                                                                                       |
|                        | Probability density function                                          | $f(t) = be^{-bt}(1 + \beta e^{-bt})^{-(\alpha+1)} [1 + \alpha\beta + \beta e^{-bt}(1 - \alpha)]$                                                                                                                                                        |
|                        | Abscissa of the mode of the probability density function <sup>a</sup> | $t^* = (-1/b)\ln x^*, 0 < x^* < 1$<br>with $x^* = (-B + \sqrt{\Delta})/(2A),$<br>$A = -\beta(\alpha - 1)^2, B = \beta\alpha^2 + 3\alpha - 2$<br>$\Delta = \alpha\beta^2\alpha^3 + 2\beta\alpha^2 + 4\beta\alpha + 5\alpha - 4\beta - 4), \Delta \geq 0$ |

<sup>a</sup> With the Bass model,  $t^* = (1/b)\ln\beta$

Appendix 3  
Nonlinear Least Square Parameter Estimates: Bass Model<sup>a</sup>

| Product category | Number of observations $t^+$ | $\hat{p}$             | $\hat{q}$ | Market size $\hat{c}$ | Predicted time to peak sales $\hat{t}^*$ | Actual time to peak sales $t^*$ |
|------------------|------------------------------|-----------------------|-----------|-----------------------|------------------------------------------|---------------------------------|
| Corn (1948)      | 11                           | .00115                | .747      | 1.0                   | 8.65                                     |                                 |
|                  | 12                           | .00105                | .766      | .989                  | 8.59                                     |                                 |
|                  | 13                           | .000857               | .796      | .966                  | 8.58                                     |                                 |
|                  | 14                           | .000810               | .804      | .961                  | 8.57                                     | 9                               |
| Ultrasound       | 11                           | .00238                | .504      | 1.0                   | 10.58                                    |                                 |
|                  | 12                           | .00313                | .477      | 1.0                   | 10.46                                    |                                 |
|                  | 13                           | .00202                | .560      | .860                  | 10.01                                    |                                 |
|                  | 14                           | .00132                | .621      | .801                  | 9.90                                     | 10.5                            |
| Foreign language | 9                            | .00323                | .602      | .411                  | 8.64                                     |                                 |
|                  | 10                           | .00351                | .569      | .446                  | 8.88                                     |                                 |
|                  | 11                           | .00328                | .588      | .430                  | 8.78                                     |                                 |
|                  | 12                           | .00189                | .697      | .376                  | 8.46                                     | 8                               |
| Mammography      | 11                           | $7.29 \times 10^{-4}$ | .774      | .576                  | 8.99                                     |                                 |
|                  | 12                           | $3.83 \times 10^{-4}$ | .870      | .529                  | 8.88                                     |                                 |
|                  | 13                           | $4.35 \times 10^{-4}$ | .853      | .536                  | 8.89                                     |                                 |
|                  | 14                           | $4.10 \times 10^{-4}$ | .861      | .533                  | 8.88                                     | 10                              |
| Corn (1943)      | 12                           | $4.00 \times 10^{-5}$ | .940      | .929                  | 10.71                                    |                                 |
|                  | 13                           | $7.62 \times 10^{-5}$ | .862      | .999                  | 10.83                                    |                                 |
|                  | 14                           | $5.16 \times 10^{-5}$ | .907      | .965                  | 10.78                                    |                                 |
|                  | 15                           | $4.11 \times 10^{-5}$ | .932      | .948                  | 10.76                                    | 11                              |
| Tetracycline     | 10                           | .0739                 | .323      | .777                  | 3.72                                     |                                 |
|                  | 11                           | .0753                 | .294      | .802                  | 3.69                                     |                                 |
|                  | 12                           | .0757                 | .286      | .809                  | 3.67                                     |                                 |
|                  | 13                           | .0767                 | .273      | .820                  | 3.63                                     |                                 |
|                  | 14                           | .0786                 | .246      | .842                  | 3.52                                     |                                 |
|                  | 15                           | .0806                 | .216      | .868                  | 3.32                                     |                                 |
|                  | 16                           | .0812                 | .207      | .876                  | 3.25                                     |                                 |
| 17               | .0812                        | .207                  | .876      | 3.24                  | 7                                        |                                 |
| Color television | 12                           | .0286                 | .280      | .900                  | 7.40                                     |                                 |
|                  | 13                           | .0288                 | .298      | .859                  | 7.14                                     |                                 |
|                  | 14                           | .0289                 | .296      | .864                  | 7.17                                     |                                 |
|                  | 15                           | .0290                 | .285      | .883                  | 7.28                                     |                                 |
|                  | 16                           | .0294                 | .268      | .910                  | 7.43                                     |                                 |
|                  | 17                           | .0299                 | .244      | .952                  | 7.66                                     | 5                               |
| Air conditioner  | 32                           | $4.80 \times 10^{-5}$ | .274      | .286                  | 31.52                                    |                                 |
|                  | 33                           | $9.28 \times 10^{-6}$ | .348      | .241                  | 30.30                                    |                                 |
|                  | 34                           | $5.96 \times 10^{-6}$ | .370      | .225                  | 29.83                                    |                                 |
|                  | 35                           | $5.92 \times 10^{-6}$ | .370      | .225                  | 29.83                                    | 31                              |
| Clothes dryer    | 25                           | $4.96 \times 10^{-5}$ | .430      | .229                  | 21.10                                    |                                 |
|                  | 26                           | $8.12 \times 10^{-5}$ | .398      | .241                  | 21.37                                    |                                 |
|                  | 27                           | $8.63 \times 10^{-5}$ | .387      | .252                  | 21.71                                    |                                 |
|                  | 28                           | $1.12 \times 10^{-4}$ | .367      | .264                  | 22.06                                    |                                 |
|                  | 29                           | $1.48 \times 10^{-4}$ | .345      | .278                  | 22.49                                    | 21                              |
| CT scanner       | 11                           | .00261                | .622      | .295                  | 8.77                                     |                                 |
|                  | 12                           | .00279                | .608      | .301                  | 8.82                                     |                                 |
|                  | 13                           | .00346                | .567      | .317                  | 8.94                                     |                                 |
|                  | 14                           | .00441                | .520      | .335                  | 9.09                                     |                                 |
|                  | 15                           | .00576                | .467      | .358                  | 9.30                                     |                                 |
|                  | 16                           | .00672                | .435      | .373                  | 9.44                                     |                                 |

|                     |    |                       |       |      |      |   |
|---------------------|----|-----------------------|-------|------|------|---|
|                     | 17 | .00788                | .400  | .391 | 9.62 |   |
|                     | 18 | .00912                | .367  | .409 | 9.82 | 9 |
| Compulsory school   | 10 | .00471                | .729  | .830 | 6.87 |   |
|                     | 11 | .00816                | .574  | .967 | 7.31 |   |
|                     | 12 | .00768                | .592  | .950 | 7.25 |   |
|                     | 13 | .00925                | .540  | 1.0  | 7.41 |   |
|                     | 14 | .00944                | .533  | 1.0  | 7.44 | 7 |
| Accelerated program | 9  | $6.05 \times 10^{-4}$ | .962  | .633 | 7.66 |   |
|                     | 10 | $4.75 \times 10^{-4}$ | 1.011 | .608 | 7.58 |   |
|                     | 11 | $7.91 \times 10^{-4}$ | .917  | .649 | 7.69 |   |
|                     | 12 | $7.42 \times 10^{-4}$ | .928  | .644 | 7.68 | 7 |

---

<sup>a</sup> The data are annual, except CT scanners (semi-annual), compulsory school attendance (four-year data), and tetracycline (monthly).

## Appendix 4

### Descriptive Accuracy of the Bass (1969) Model and the Gamma/Shifted Gompertz Model

| Product category    | Bass model              |                    | Gamma/Shifted Gompertz model |                    |
|---------------------|-------------------------|--------------------|------------------------------|--------------------|
|                     | Mean absolute deviation | Mean squared error | Mean absolute deviation      | Mean squared error |
| Corn (1948)         | 7.37                    | 73.91              | 4.45                         | 29.06              |
| Ultrasound          | 2.95                    | 11.63              | 1.73                         | 5.33               |
| Foreign language    | .66                     | .55                | .52                          | .36                |
| Mammography         | 1.70                    | 3.93               | 1.07                         | 2.12               |
| Corn (1943)         | 3.35                    | 14.15              | 3.09                         | 12.28              |
| Tetracycline        | 1.39                    | 3.67               | 1.39                         | 3.67               |
| Color TV            | 1.75                    | 5.33               | 1.70                         | 4.71               |
| Air conditioner     | .15                     | .086               | .17                          | .082               |
| Clothes dryer       | .21                     | .11                | .13                          | .043               |
| CT scanner          | 14.67                   | 464.49             | 10.26                        | 277.49             |
| Compulsory school   | .92                     | 1.29               | .82                          | 1.09               |
| Accelerated program | 1.90                    | 6.22               | 1.94                         | 5.24               |
| Overall mean        | 3.09                    | 48.78              | 2.27                         | 28.5               |

## Appendix 5

Accuracy of the One-Step Ahead, Two-Step Ahead and Three-Step Ahead Forecasts Given By the Bass Model and the Gamma/Shifted Gompertz Model<sup>a</sup>

| Product/Service     | Forecasting Period | Bass model |       |       |         |         |         | Gamma/shifted Gompertz model |       |       |        |         |         |
|---------------------|--------------------|------------|-------|-------|---------|---------|---------|------------------------------|-------|-------|--------|---------|---------|
|                     |                    | MAD1       | MAD2  | MAD3  | MSE1    | MSE2    | MSE3    | MAD1                         | MAD2  | MAD3  | MSE1   | MSE2    | MSE3    |
| Air conditioners    | 1962-1964          | .24        | .50   | .59   | .15     | .41     | .53     | .47                          | .64   | .51   | .33    | .50     | .33     |
| Clothes dryers      | 1961-1964          | .72        | .82   | .89   | .56     | .72     | .85     | .33                          | .43   | .54   | .15    | .23     | .35     |
| Color TV            | 1975-1979          | 1.53       | 1.43  | 1.41  | 3.03    | 2.83    | 2.82    | 1.19                         | 1.05  | .99   | 1.88   | 1.53    | 1.44    |
| Corn (1948)         | 1940-1942          | 6.92       | 7.83  | 8.03  | 53.84   | 65.38   | 68.03   | 2.85                         | 2.93  | 3.83  | 15.01  | 13.54   | 18.56   |
| Corn (1943)         | 1939-1941          | 5.03       | 4.27  | 3.25  | 25.74   | 23.03   | 15.33   | 12.62                        | 13.64 | 15.93 | 328.25 | 299.71  | 386.48  |
| Tetracycline        | Nov 54-Feb 55      | 1.49       | 1.64  | 1.86  | 3.16    | 3.57    | 4.28    | 2.59                         | 2.78  | 3.04  | 8.72   | 9.14    | 10.16   |
| Ultrasound          | 1977-1978          | 6.02       | 8.25  |       | 37.27   | 69.59   |         | .91                          | 1.09  |       | .84    | 1.19    |         |
| Mammography         | 1975-1978          | 2.09       | 1.65  | 2.16  | 6.79    | 5.10    | 7.19    | 1.35                         | 1.75  | 1.27  | 3.31   | 4.29    | 2.64    |
| CT scanning         | 1977-1981          | 31.41      | 35.37 | 38.68 | 1132.91 | 1388.09 | 1649.71 | 29.12                        | 34.98 | 40.62 | 885.24 | 1331.18 | 1804.91 |
| Foreign language    | 1963               | 2.31       |       |       | 5.34    |         |         | 1.60                         |       |       | 2.54   |         |         |
| Accelerated program | 1962-1963          | 1.89       | 1.59  |       | 5.23    | 5.05    |         | 1.89                         | 1.58  |       | 3.82   | 3.15    |         |
| Compulsory school   | 1894-1902          | .96        | .94   | 1.00  | 1.32    | 1.18    | 1.37    | .89                          | .84   | .89   | 1.12   | .97     | 1.13    |
| Overall mean        |                    | 5.05       | 5.85  | 6.43  | 106.28  | 142.27  | 194.46  | 4.65                         | 5.61  | 7.51  | 104.27 | 151.40  | 247.33  |

<sup>a</sup> MAD1 denotes the mean absolute deviation of the one-step ahead forecasts and MSE1 denotes the mean squared error of the one-step ahead forecasts.
